# Supplementary material for: Whole Exome Sequencing-Based Identification of a Novel Gene Involved in Root Hair Development in Barley (Hordeum vulgare L.)
Source: MDPI journal article supplement (doi:10.3390/ijms222413411), 2021-12-14
Supplement: s1 [file s1]

**Table S1.** Analysis of F<sub>2</sub> progeny of a cross *hvexpb5.i* x parent cv. ‘Sebastian’ (WT). The *hvexpb5.i* mutant carries C773T mutation in the *HvEXPB5* gene and exhibits extremely short root hairs.

| Genotypic classes in regards<br>to C773T mutation in<br>the <i>HvEXPB5</i> gene | Number of F <sub>2</sub> plants with |                  |
|---------------------------------------------------------------------------------|--------------------------------------|------------------|
|                                                                                 | Wild type root hairs                 | Short root hairs |
| Homozygous for mutation                                                         | 13                                   | 20               |
| Heterozygous for mutation                                                       | 75                                   | 27               |
| Homozygous for the WT allele                                                    | 39                                   | 0                |

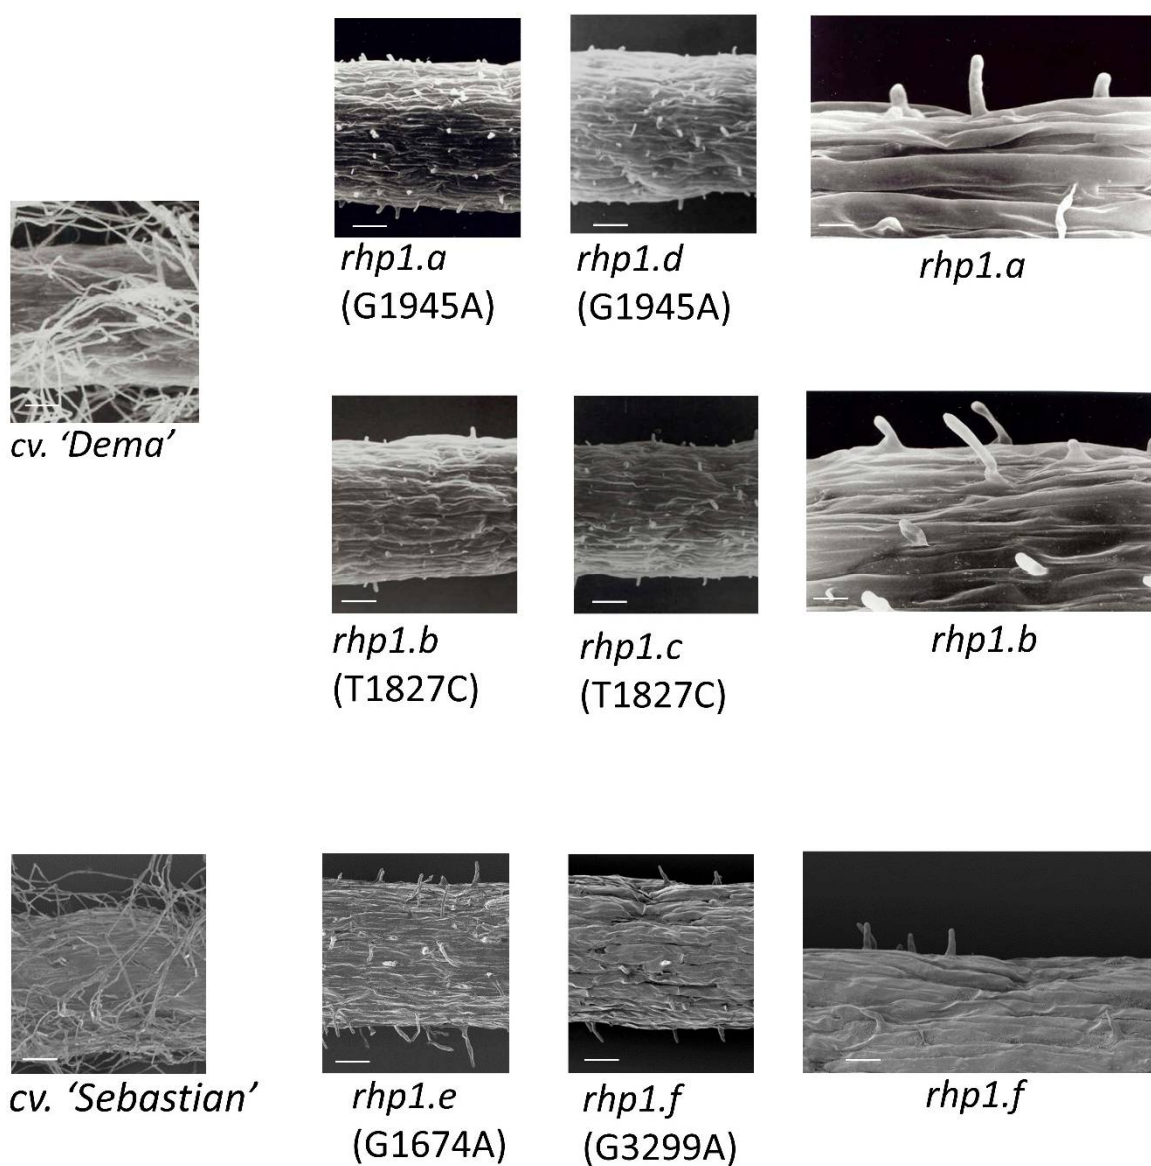

**Figure S1.** SEM images of barley *rhp* (root hair primordia) mutants and their parent varieties. Root hair zone of 5-7-day old seedlings. Bars = 100 μm.

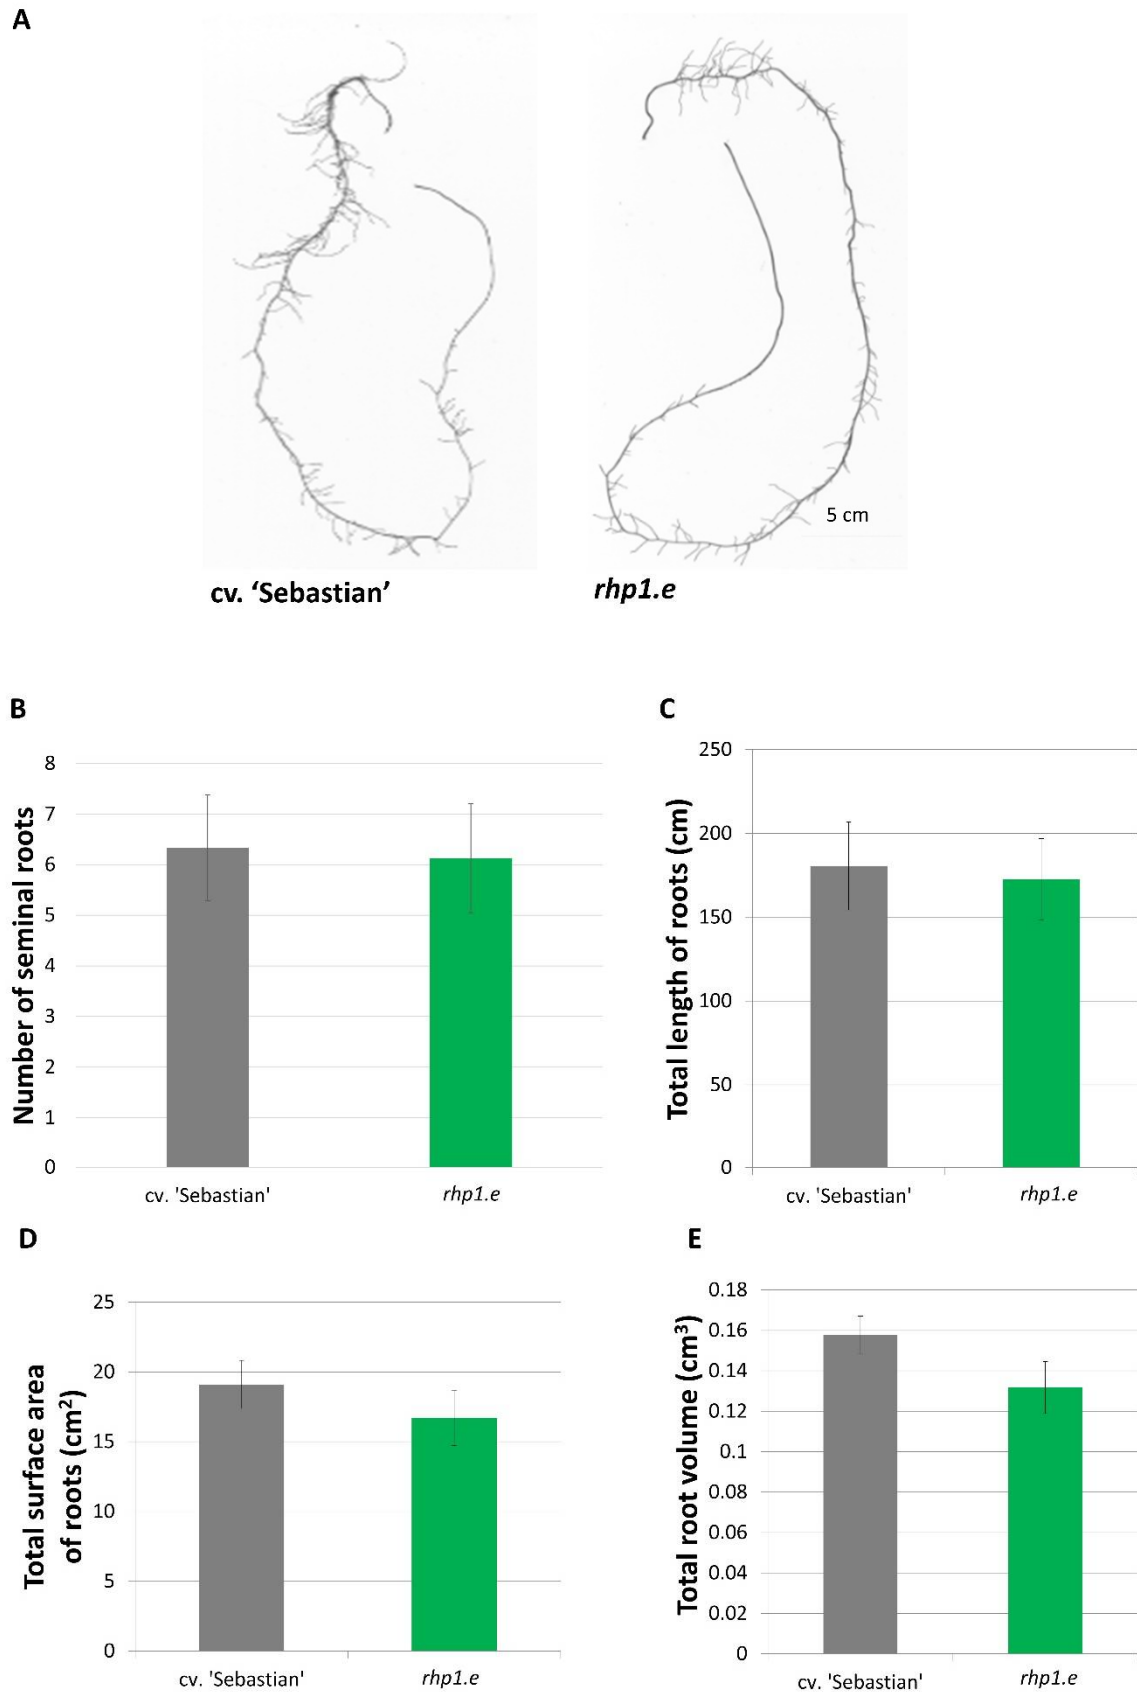

**Figure S2.** Root system analysis of *rhp1.e* mutant and WT cv. 'Sebastian' at 14-day seedling stage. **(A)** The longest seminal root in mutant and WT. Root system parameters of *rhp1.e* mutant and WT plants: **(B)** Number of seminal roots, **(C)** Total length of roots, **(D)** Total surface area of roots and **(E)** Total root volume. Significant differences between *rhp1.e* mutant and WT were estimated using Student's t-test. Graphs show mean value of four biological replicates (each replicate represented six plants per genotype) with SD.

**A**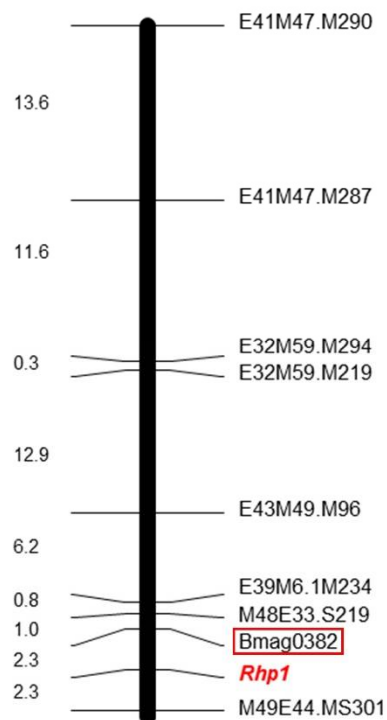**B**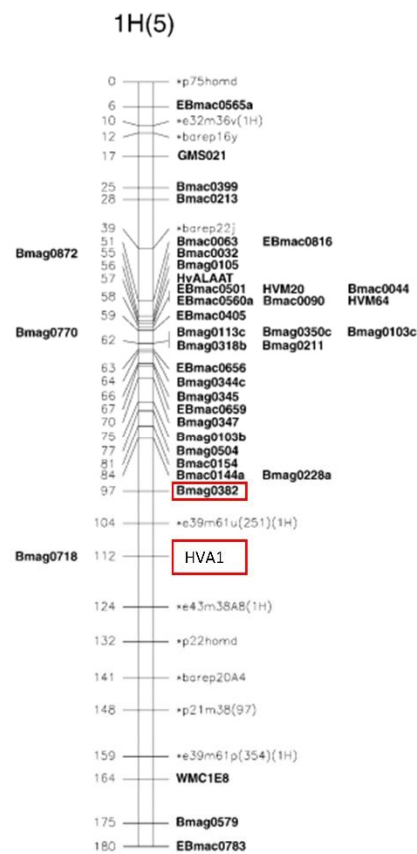

**Figure S3.** Location of *rhp1* gene on barley chromosome 1H. (A) Linkage group of *rhp1* gene on chromosome 1H based on the *rhp1.b* x 'Morex' mapping population (from Chmielewska et al., 2014 [41]), (B) Molecular linkage map of barley of 'Lina' x *Hordeum spontaneum* Canada Park population (based on Ramsay et al., 2000 [44]).

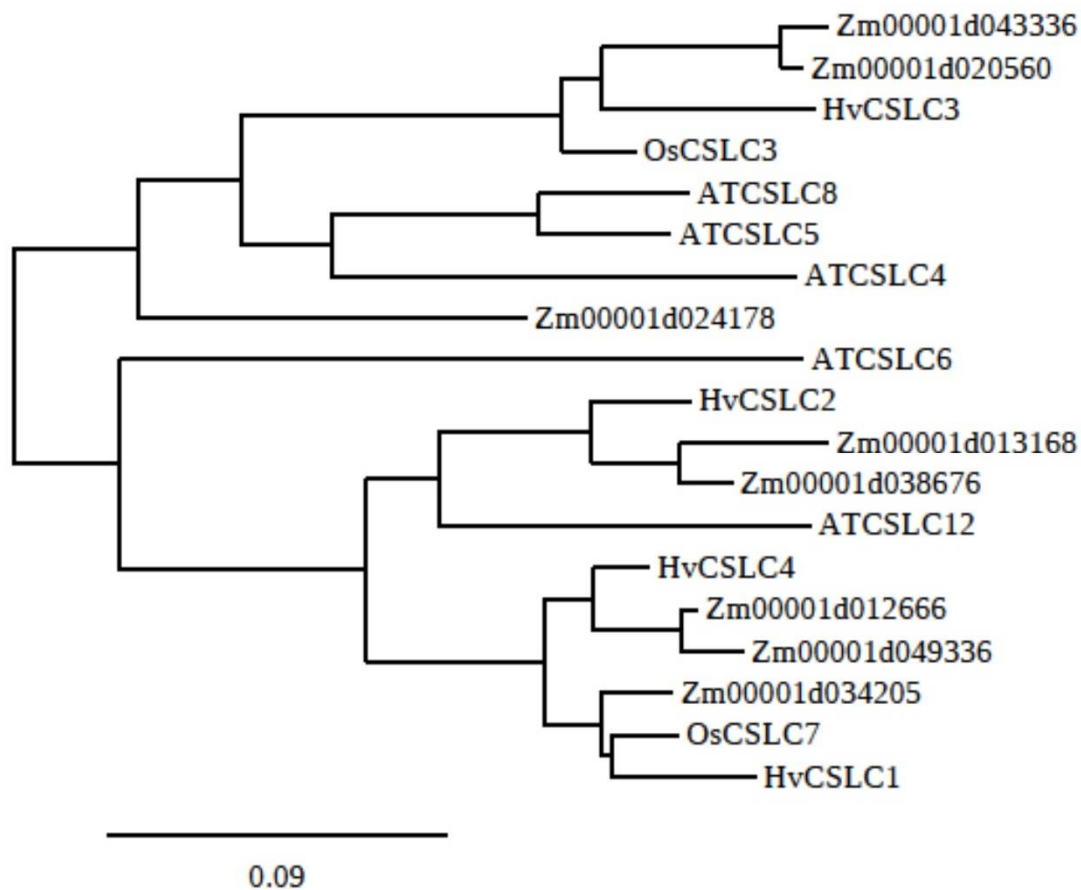

**Figure S4.** Phylogenetic analysis of CSLC members expressed in the root of *A. thaliana* (AT), *Z. mays* (Zm), *O. sativa* (Os) and *H. vulgare* (Hv). The tree was generated using Phylogeny.fr ([www.phylogeny.fr](http://www.phylogeny.fr)) in “OneClick” mode [93]. This pipeline connects the following programs: MUSCLE for multiple alignment, Gblocks for automatic alignment curation, PhyML with the approximate Likelihood Ratio Test of branch support for tree building and TreeDyn for tree drawing.

**A**

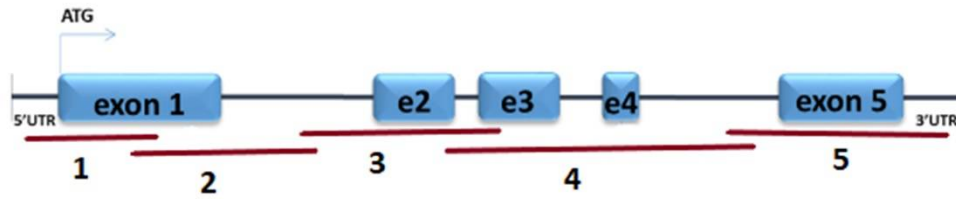

**B**

| Primer sequence          | Ta | Amplified fragment No. |
|--------------------------|----|------------------------|
| Forward                  | 56 | 1                      |
| CTCGTTTCGGTTTGACACG      |    |                        |
| Reverse                  | 56 | 1                      |
| ATCTCGGGCATCTCAAGGT      |    |                        |
| Forward                  | 56 | 2                      |
| GCTTCTACGGCTGCCTCA       |    |                        |
| Reverse                  | 56 | 2                      |
| ACCGGTGACGACAACTTCT      |    |                        |
| Forward                  | 56 | 3                      |
| TCCAATCACGACTCTGATGC     |    |                        |
| Reverse                  | 56 | 3                      |
| CGAAGTGGAAGCACAGGTTT     |    |                        |
| Forward                  | 56 | 4                      |
| CAAGGTTTGACTCGACTGAGC    |    |                        |
| Reverse                  | 56 | 4                      |
| AGATGTGCTGGCATGAATTG     |    |                        |
| Forward                  | 56 | 5                      |
| CACCCTCTTATACTCAAGCAGTCA |    |                        |
| Reverse                  | 56 | 5                      |
| CCCGTCCAAAGGGTTTAGAT     |    |                        |

**Figure S5. (A)** The structure of the candidate gene *HORVU1Hr1G077230* and fragments used for its amplification. **(B)** The list of primer sequences used for PCR amplification of the *HORVU1Hr1G077230* gene in *rhp1* mutants. Ta - annealing temperature

**Table S2.** The list of primer sequences used in qPCR analysis. Ta - annealing temperature

| Gene           | Primer sequence       | Ta |
|----------------|-----------------------|----|
| <i>HvCSLC1</i> | Forward               | 56 |
|                | ATCGTCCCGTACCTCCTCTT  |    |
|                | Reverse               |    |
|                | CTTCTTGGTGACCACCCACT  |    |
| <i>HvXT1</i>   | Forward               | 56 |
|                | GGTCGAGTTCTTCTGGTGGA  |    |
|                | Reverse               |    |
|                | TGTCGTCGTAGACCATCTCG  |    |
| <i>HvMUR3</i>  | Forward               | 56 |
|                | AATCTGACTGGGGCAACAAC  |    |
|                | Reverse               |    |
|                | CTTTGGCAGGGTGGGAAGTAA |    |
| <i>HvXLT2</i>  | Forward               | 56 |
|                | CTGCTCGCCATGTGTGATAC  |    |
|                | Reverse               |    |
|                | CGACAAGCTGGTCCCTTC    |    |
| <i>HvMUR2</i>  | Forward               | 56 |
|                | GGCAACATGCTCAAGAACAA  |    |
|                | Reverse               |    |
|                | TCGTGCTCGAGGTAGACGTA  |    |
| <i>HvAXY4</i>  | Forward               | 56 |
|                | CACCGTCTCCATCTTCTGGT  |    |
|                | Reverse               |    |
|                | TCGAGGAACACGTTGTTGTG  |    |
| <i>HvAXY4L</i> | Forward               | 56 |
|                | CTCTACTCGTCCCGGAGCTT  |    |
|                | Reverse               |    |
|                | GATCGTCGTCATCCTCTGGT  |    |
| <i>HvXTH14</i> | Forward               | 56 |
|                | ACACCAACGTGTATGCCAGA  |    |
|                | Reverse               |    |
|                | TGGGTCCAAATGATGCTGTA  |    |
| <i>HvCSLC3</i> | Forward               | 56 |
|                | ATGAGCTGCGACTACGTCAA  |    |
|                | Reverse               |    |
|                | AGGTACGGTGAGCTTGAGGA  |    |
