# Supplementary material for: Whole Exome Sequencing-Based Identification of a Novel Gene Involved in Root Hair Development in Barley (Hordeum vulgare L.)
Source: Int J Mol Sci. 2021 Dec 14;22(24):13411. doi: 10.3390/ijms222413411 (PMC8709170; doi:10.3390/ijms222413411)
Supplement: Supplementary file 1 [file ijms-22-13411-s001.zip]

Archive with 8 entries (8 files):
- SF_S1.jpg
- SF_S2.jpg
- SF_S3.jpg
- SF_S4.jpg
- SF_S5.jpg
- Tab_S1.jpg
- Tab_S2.jpg
- K Gajek_Suppl Mat_IJMS_13122021.pdf
